# Supplementary material for: Phytophenol Dimerization Reaction: From Basic Rules to Diastereoselectivity and Beyond
Source: MDPI journal article supplement (doi:10.3390/molecules27154842), 2022-07-28
Supplement: s1 [file s1]

| Entry                 | Typical reaction equation                                                            | Explanations or prediction                                                                                                                                                                                                                                                                                                                                                                                                                                                                                                                                                                                                                  | Field                     |
|-----------------------|--------------------------------------------------------------------------------------|---------------------------------------------------------------------------------------------------------------------------------------------------------------------------------------------------------------------------------------------------------------------------------------------------------------------------------------------------------------------------------------------------------------------------------------------------------------------------------------------------------------------------------------------------------------------------------------------------------------------------------------------|---------------------------|
| Eq. 1 <sup>[1]</sup>  | 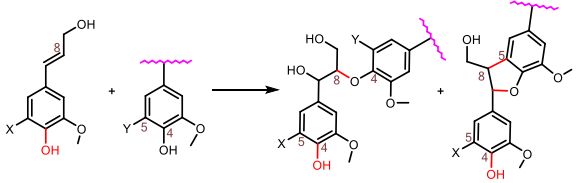   | <p>The exocyclic C=C involved PRC reaction also occurs in enzymatic lignification.<sup>[2],[3]</sup> Adhering to the second precondition, subunits in lignin bear <i>para</i>-OH groups. However, these subunits include caffeoyl, <i>para</i>-coumaroyl, feruloyl, and sinapyl.<sup>[4],[5],[6],[7]</sup> Occasionally, the <i>para</i>-OH group may also be expanded via conjugation or substitution. Eq. 1 is a typical instance. By comparison, there is neither <i>meta</i>-coumaroyl nor isoferuloyl because of the presence of a <i>meta</i>-OH group and the absence of <i>para</i>-OH group.<sup>[8,9],[2,7,10],[11],[3]</sup></p> | lignin chemistry          |
| Eq. 2 <sup>[12]</sup> |    | <p>Eq. 2 shows the dimerization piceatannol to form scirpusin B. This is an exocyclic C=C participated PRC. Thus, piceatannol was found to co-exist with its furan-fused dimer, scirpusin B, the same plant as passion fruit seed.<sup>[13]</sup> Previous studies have not assigned the configurations of the two chiral atoms.<sup>[12],[13]</sup> Herein, the configuration of scirpusin B was predicted to be <math>\alpha R, \beta R</math>, according to the aforementioned stereochemical characteristics.</p>                                                                                                                       |                           |
| Eq. 3 <sup>[14]</sup> |   | <p>Eq. 3 describes the cross-dimerization of <i>E</i>-resveratrol monomer and its dimer, <i>trans</i> <math>\epsilon</math>-viniferin. Thus, the product ampelopsin E can be considered as a trimer of <i>E</i>-resveratrol. The trimerization process is also controlled by relevant rules.</p>                                                                                                                                                                                                                                                                                                                                            | natural product chemistry |
| Eq. 4 <sup>[15]</sup> |  | <p>As mentioned above, the trimerization can be regarded as a PRC reaction between the monomer and dimer. Thus, stilbene trimerization complies with the rules, especially in terms of the stereoselectivity. This resembles the chemical synthesis of stilbene oligomers.<sup>[16]</sup></p>                                                                                                                                                                                                                                                                                                                                               |                           |

|                       |                                                                                             |                                                                                                                                                                                                                                                                                                                                                                                                                                                                                                                                                                 |                     |
|-----------------------|---------------------------------------------------------------------------------------------|-----------------------------------------------------------------------------------------------------------------------------------------------------------------------------------------------------------------------------------------------------------------------------------------------------------------------------------------------------------------------------------------------------------------------------------------------------------------------------------------------------------------------------------------------------------------|---------------------|
| Eq. 5 <sup>[17]</sup> | <p>M-desertorin A      7-demethylsiderin      P-orlandin</p>                                | <p>P450-mediated dimerization is a free radical process. According to the <i>meta</i>-excluded and C-C bonding domination rules, 7-demethylsiderin has three possible linkages, i.e., 8,8', 6,8', and 6,6'. Our calculations indicate that these three possible linkages have similar energies (the <math>\Delta G</math> values were calculated to be <math>-1450.6955</math>, <math>-1450.6949</math>, and <math>-1450.6990</math> Hartree, respectively). Hence, any of these linkages are possible. However, the P450 enzyme excludes the 6,6'-linkage.</p> | synthetic chemistry |
| Eq. 6 <sup>[18]</sup> | <p>enzymatic <math>\bullet O_2^-</math></p>                                                 | <p><math>Cu^+</math> oxidation can lead to ROS formation. The ROS (such as <math>\bullet O_2^-</math>) can induce tyrosine to undergo a PRC reaction. According to the <i>meta</i>-excluded and C-C bonding domination rules, tyrosine can only use the 3-position for cross-linking.</p>                                                                                                                                                                                                                                                                       | enzyme chemistry    |
| Eq. 7 <sup>[19]</sup> | <p>2,6-lutidine<br/>CH<sub>3</sub>CN, 0.6V</p> <p>conferyl alcohol      (±) hierochin D</p> | <p>Eq. 7 is also an exocyclic C=C participated PRC reaction. However, the reaction is driven by current. Possibly due to the surplus energy, the reactant can overcome the energy barrier to produce a pair of enantiomers. However, no diastereomers are generated. This can also be attributed to the diastereoselectivity mentioned-above.</p>                                                                                                                                                                                                               | neurochemistry      |
| Eq. 8 <sup>[20]</sup> | <p>electrode</p>                                                                            | <p>Under electrochemical conditions, the phenolic core can be oxidized into a radical intermediate and initiate a cross-PRC reaction. In line with the <i>meta</i>-excluded rule, both the 5- and 7-positions were preferential sites for reaction. Our calculations suggest that the <math>\Delta G</math> value (<math>-1224.0282</math> Hartree) of the <i>para</i>-5 linkage was lower than that of the <i>para</i>-7 linkage (<math>-1224.0276</math> Hartree). Thus, the cross-PRC reaction can be described using Eq. 8.</p>                             | electrochemistry    |

Eq. 9<sup>[21]</sup>

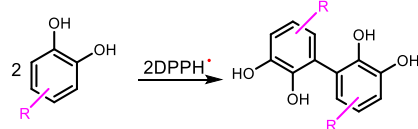

According to the *ortho*-diOHs co-activated rule, all sites may be linked and thus, the description shown in Eq. 9 is generally acceptable. A similar instance can also be found in the catecholic unit of peptides.<sup>[22]</sup>

## References

1. van Parijs, F.R., et al., *Modeling lignin polymerization. I. Simulation model of dehydrogenation polymers*. Plant Physiol, 2010. **153**(3): p. 1332-44.
2. Sangha, A.K., et al., *Radical coupling reactions in lignin synthesis: a density functional theory study*. J Phys Chem B, 2012. **116**(16): p. 4760-8.
3. Voxeur, A., Y. Wang, and R. Sibout, *Lignification: different mechanisms for a versatile polymer*. Curr Opin Plant Biol, 2015. **23**: p. 83-90.
4. Petrik, D.L., et al., *p-Coumaroyl-CoA:monolignol transferase (PMT) acts specifically in the lignin biosynthetic pathway in Brachypodium distachyon*. Plant J, 2014. **77**(5): p. 713-26.
5. Obel, N. and H.V. Scheller, *Enzymatic synthesis and purification of caffeoyl-CoA, p-coumaroyl-CoA, and feruloyl-CoA*. Anal Biochem, 2000. **286**(1): p. 38-44.
6. Vismeh, R., et al., *Profiling of diferulates (plant cell wall cross-linkers) using ultrahigh-performance liquid chromatography-tandem mass spectrometry*. Analyst, 2013. **138**(21): p. 6683-92.
7. Zhu, X., et al., *Lignin-Biosynthetic Study: Reactivity of Quinone Methides in the Diastereopreferential Formation of p-Hydroxyphenyl- and Guaiacyl-Type beta- O-4 Structures*. J Agric Food Chem, 2019. **67**(8): p. 2139-2147.
8. Tobimatsu, Y. and M. Schuetz, *Lignin polymerization: how do plants manage the chemistry so well?* Curr Opin Biotechnol, 2019. **56**: p. 75-81.
9. Davin, L.B., et al., *Dissection of lignin macromolecular configuration and assembly: comparison to related biochemical processes in allyl/propenyl phenol and lignan biosynthesis*. Nat Prod Rep, 2008. **25**(6): p. 1015-90.
10. Morreel, K., et al., *Mass spectrometry-based sequencing of lignin oligomers*. Plant Physiol, 2010. **153**(4): p. 1464-78.
11. Reale, S., et al., *Lignin chemistry: biosynthetic study and structural characterisation of coniferyl alcohol oligomers formed in vitro in a micellar environment*. Chemistry, 2010. **16**(20): p. 6077-87.
12. Carlos Del Rio, J., et al., *Hydroxystilbenes Are Monomers in Palm Fruit Endocarp Lignins*. Plant Physiol, 2017. **174**(4): p. 2072-2082.
13. Sano, S., et al., *Identification of the strong vasorelaxing substance scirpusin B, a dimer of piceatannol, from passion fruit (Passiflora edulis) seeds*. J Agric Food Chem, 2011. **59**(11): p. 6209-13.

14. Wibowo, A., et al., *Malaysianol A, a new trimer resveratrol oligomer from the stem bark of Dryobalanops aromatica*. Fitoterapia, 2011. **82**(4): p. 676-81.
15. Snyder, S.A., A. Gollner, and M.I. Chiriac, *Regioselective reactions for programmable resveratrol oligomer synthesis*. Nature, 2011. **474**(7352): p. 461-6.
16. Keylor, M.H., et al., *Synthesis of resveratrol tetramers via a stereoconvergent radical equilibrium*. Science, 2016. **354**(6317): p. 1260-1265.
17. Mazzaferro, L.S., et al., *Cytochrome P450-catalyzed regio- and stereoselective phenol coupling of fungal natural products*. J Am Chem Soc, 2015. **137**(38): p. 12289-95.
18. Abeyawardhane, D.L., et al., *Copper Induced Radical Dimerization of alpha-Synuclein Requires Histidine*. J Am Chem Soc, 2018. **140**(49): p. 17086-17094.
19. Romero, K.J., et al., *Electrochemical Dimerization of Phenylpropenoids and the Surprising Antioxidant Activity of the Resultant Quinone Methide Dimers*. Angew Chem Int Ed Engl, 2018. **57**(52): p. 17125-17129.
20. Schafer, H.J., *Unsymmetrical Biaryl Compounds: Metal- and Reagent-Free Electrochemical Couplings Are on the Advance*. Angew Chem Int Ed Engl, 2017. **56**(49): p. 15502-15503.
21. Guitard, R., et al., *Myricetin, rosmarinic and carnosic acids as superior natural antioxidant alternatives to alpha-tocopherol for the preservation of omega-3 oils*. Food Chem, 2016. **213**: p. 284-295.
22. Lampel, A., et al., *Polymeric peptide pigments with sequence-encoded properties*. Science, 2017. **356**(6342): p. 1064-1068.
