# Supplementary material for: Phytophenol Dimerization Reaction: From Basic Rules to Diastereoselectivity and Beyond
Source: MDPI journal article supplement (doi:10.3390/molecules27154842), 2022-07-28
Supplement: s1 [file s1]

## Suppl. 3 45 instances of 3,7-dioxabicyclo[3.3.0]octane lignin with *trans*- $\alpha$ H, $\beta$ H <sup>[1] [2] [3]</sup>

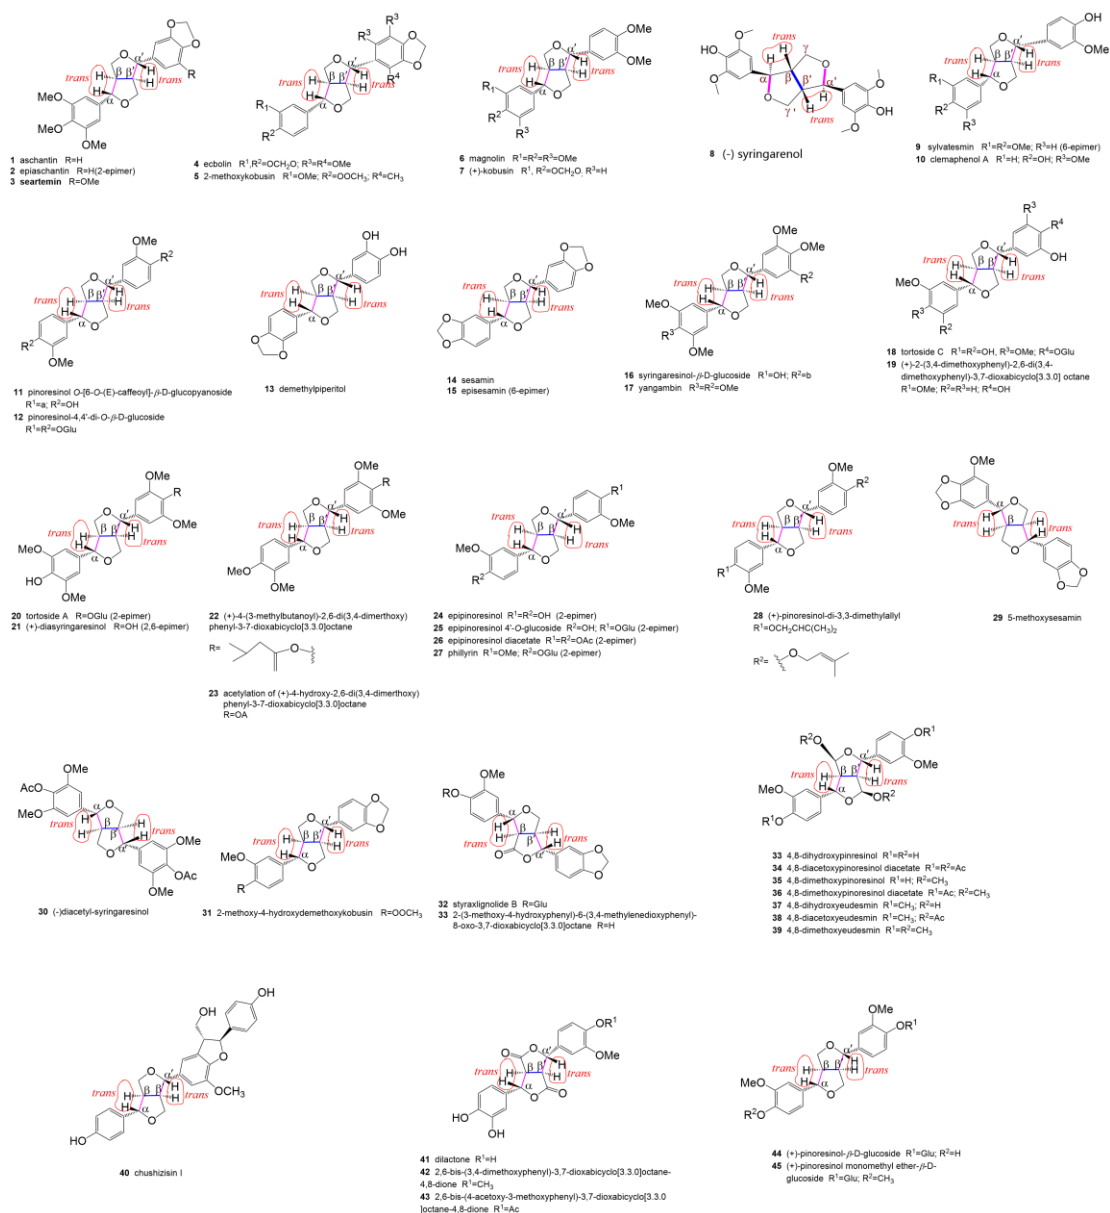

## References

- [1] Yang, J.S., *<sup>13</sup>C-NMR Spectroscopic Databook of Natural Products*. stilbene. Vol. stilbene. 2011, Beijing: Chemical Industry Press. 2244-2277.
- [2] Davin, L.B.; Wang, H.B.; Crowell, A.L.; Bedgar, D.L.; Martin, D.M.; Sarkanen, S.; Lewis, N.G. Stereoselective bimolecular phenoxy radical coupling by an auxiliary (dirigent) protein without an active center. *Science*. **1997**, 275, 362-366.
- [3] Wang, C.; Tallian, C.; Su, J.; Vielnascher, R.; Silva, C.; Cavaco-Paulo, A.; Guebitz, G.M.; Fu, J. Ultrasound-assisted extraction of hemicellulose and phenolic compounds from bamboo bast fiber powder. *PLoS One*. **2018**, 13, e0197537.
