# Supplementary material for: Phytophenol Dimerization Reaction: From Basic Rules to Diastereoselectivity and Beyond
Source: MDPI journal article supplement (doi:10.3390/molecules27154842), 2022-07-28
Supplement: s1 [file s1]

# Phytophenol Dimerization Reaction: From Basic Rules to Diastereoselectivity and Beyond

Shuqin Liu <sup>1,†</sup>, Xican Li <sup>1,\*†</sup>, Ban Chen <sup>1</sup>, Xiaojian Ouyang <sup>1</sup>, Yulu Xie <sup>1</sup> and Dongfeng Chen <sup>2,\*</sup>

<sup>1</sup> School of Chinese Herbal Medicine, Guangzhou University of Chinese Medicine, Guangzhou Higher Education Mega Center, Waihuang East Road No. 232, Guangzhou 510006, China; 20201110616@stu.gzucm.edu.cn (S.L.); imchenban@foxmail.com (B.C.); [oyxiaojian55@163.com](mailto:oyxiaojian55@163.com) (X.O.); xieyulu1900@163.com (Y.X.)

<sup>2</sup> School of Basic Medical Science, Guangzhou University of Chinese Medicine, Guangzhou Higher Education Mega Center, Waihuang East Road No. 232, Guangzhou 510006, China

\* Correspondence: [lixican@126.com](mailto:lixican@126.com) (X.L.); [chen888@gzucm.edu.cn](mailto:chen888@gzucm.edu.cn) (D.C.)

† These authors contributed equally to this work.

Homepage [http://www.researchgate.net/profile/Xican\\_Li](http://www.researchgate.net/profile/Xican_Li)

Tel: +86-20-39358076      Fax: +86-20-38892690

## Note:

The dimerization reaction was initiated using DPPH<sup>•</sup> or enzyme in methanol solution. The product identifications or exclusions were based on the comparison of their MS/MS spectra, a commonly used method for *in situ* identification <sup>[1],[2]</sup>. To enhance the accuracy of identification, some important MS fragments (especially molecular ion peaks) were also listed their calculated *m/z* values. The *m/z* value calculation is based on the relative atomic masses of C (12.0000), H (1.007825), O (15.994915), and N (14.003074) <sup>[3]</sup>. The relative standard deviation (RSD) value was also calculated, using the formula: RSD = experimental *m/z* value ÷ calculated *m/z* value.

---

## Contents

- Fig. S1.1 The molecular ion peak and MS/MS spectra of standard 2,2'-biphenol (1a)  
Fig. S1.2 The molecular ion peak and MS/MS spectra of standard 2,4'-biphenol (1b)  
Fig. S1.3 The molecular ion peak and MS/MS spectra of standard 4,4'-biphenol (1c)  
Fig. S1.4 The molecular ion peak and MS/MS spectra of standard 4-hydroxydiphenyl ether (1d)  
Fig. S1.5 The molecular ion peak and MS/MS spectra of standard 2-hydroxydiphenyl ether (1e)  
Fig. S1.6 The main UHPLC–ESI-Q-TOF-MS results of dimerization products of DPPH•-treated phenol (1) in methanol and product identifications  
Fig. S2.1 The molecular ion peak and MS/MS spectra of standard magnolol (2a)  
Fig. S2.2 The molecular ion peak and MS/MS spectra of standard 4,4'-diallyl-1-hydroxydiphenyl ether (2b)  
Fig. S2.3 The main UHPLC–ESI-Q-TOF-MS results of dimerization products of DPPH•-treated 4-allylphenol (2) in methanol and product identifications  
Fig. S3.1 The molecular ion peak and MS/MS spectra of standard honokiol (3a)  
Fig. S3.2 The main UHPLC–ESI-Q-TOF-MS results of products of DPPH•-treated 4-allylphenol (2) *plus* 2-allylphenol (3) in methanol.  
Fig. S4.1 The chromatographic peaks of dimerization products of DPPH•-treated syringic acid (4) in methanol  
Fig. S5.1 The screenshot of documented data and elucidation of [6]-gingerol 6,6'-dimer (5a) and [10]-gingerol 6,6'-dimer (6a)  
Fig. S5.2 The main UHPLC–ESI-Q-TOF-MS results of dimerization products of DPPH•-treated [6]-gingerol (5) in methanol and [6]-gingerol 6,6' dimer (5a) identification.  
Fig. S6.1 The main UHPLC–ESI-Q-TOF-MS results of dimerization products of DPPH•-treated [10]-gingerol (6) in methanol and [10]-gingerol 6,6' dimer (6a) identification  
Fig. S7.1 The MS elucidation of capsaicin 6,6'-dimer (7a)  
Fig. S7.2 The main UHPLC–ESI-Q-TOF-MS results of dimerization products of DPPH•-treated capsaicin (7) in methanol and product identification.  
Fig. S8.1 The molecular ion peak and MS/MS spectra of standard tyrosine 3,3'-dimer (8a)  
Fig. S8.2 The main UHPLC–ESI-Q-TOF-MS results of dimerization products of DPPH•-treated tyrosine (8) in methanol and product identification.  
Fig. S9.1 The molecular ion peak and MS/MS spectra of standard euphorbetin (9a)  
Fig. S9.2 The molecular ion peak and MS/MS spectra of standard isoeuphorbetin (9b)  
Fig. S9.3 The main UHPLC–ESI-Q-TOF-MS results of dimerization products of DPPH•-treated esculetin (9) in methanol and product identification  
Fig. S10.1 The molecular ion peak and MS/MS spectra of standard 3,6-dimethoxycatechol  $\beta,\beta'$ -dimer (10a)  
Fig. S10.2 The main UHPLC–ESI-Q-TOF-MS results of dimerization products of DPPH•-treated 3,6-dimethoxycatechol (10) in methanol and product identification  
Fig. S11.1 The MS elucidation of bis-eugenol (11a)  
Fig. S11.2 The main UHPLC–ESI-Q-TOF-MS results of dimerization products of DPPH•-treated eugenol (11) in methanol and product identification.  
Fig. S12.1 The molecular ion peak and MS/MS spectra of standard dehydrodiisoeugenol (12a).  
Fig. S12.2 The main UHPLC–ESI-Q-TOF-MS results of dimerization products of DPPH•-treated isoeugenol (12) in methanol and product identification.  
Fig. S13.1 The typical UHPLC–ESI-Q-TOF-MS results of dimerization products of DPPH•-treated coniferyl alcohol (13) in methanol.  
Fig. S13.2 The typical UHPLC–ESI-Q-TOF-MS results of dimerization products of HRP-catalyzed coniferyl alcohol (13)  
Fig. S13.3 The main results of HPLC-UV analyses for product identification of coniferyl alcohol (13) dimerization

## References

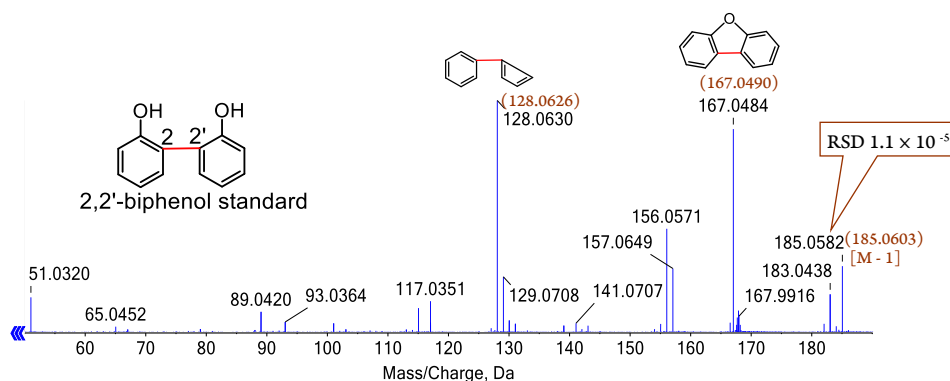

**Fig. S1.1** The molecular ion peak and MS/MS spectra of standard 2,2'-biphenol (**1a**, C<sub>12</sub>H<sub>10</sub>O<sub>2</sub>, CAS 1806-29-7, M.W. 186.0681). The bracketed value is the calculated *m/z* value. RSD = experimental *m/z* value ÷ calculated *m/z* value.

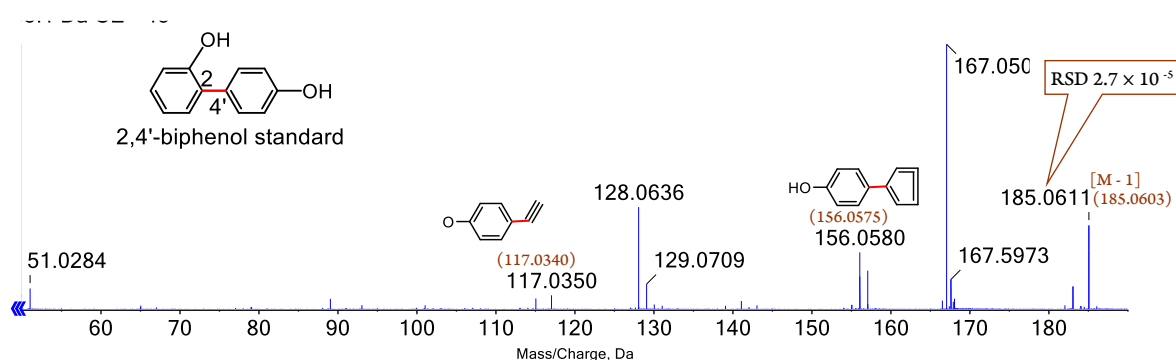

**Fig. S1.2** The molecular ion peak and MS/MS spectra of standard 2,4'-biphenol (**1b**, C<sub>12</sub>H<sub>10</sub>O<sub>2</sub>, newly synthesized, M.W. 186.0681). The bracketed value is the calculated *m/z* value. RSD = experimental *m/z* value ÷ calculated *m/z* value.

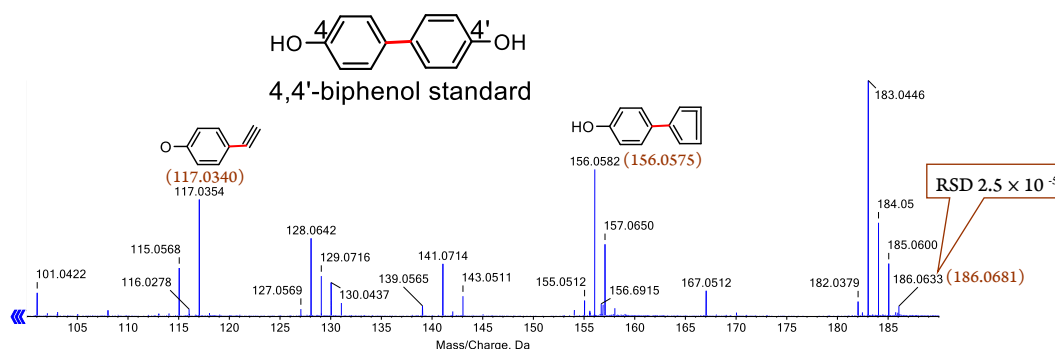

**Fig. S1.3** The molecular ion peak and MS/MS spectra of standard 4,4'-biphenol (**1c**, C<sub>12</sub>H<sub>10</sub>O<sub>2</sub>, CAS 92-88-6, M.W. 186.0681). The bracketed value is the calculated *m/z* value. RSD = experimental *m/z* value ÷ calculated *m/z* value.

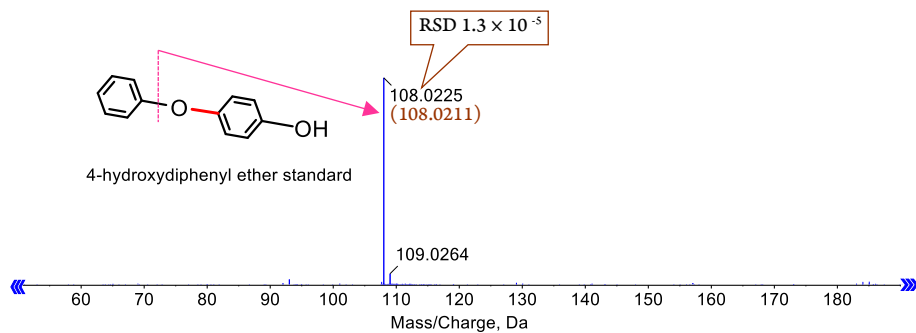

**Fig. S1.4** The molecular ion peak and MS/MS spectra of standard 4-hydroxydiphenyl ether (**1d**,  $C_{12}H_{10}O_2$ , CAS 831-82-3, M.W. 186.0681)

The bracketed value is the calculated  $m/z$  value. RSD = experimental  $m/z$  value  $\div$  calculated  $m/z$  value.

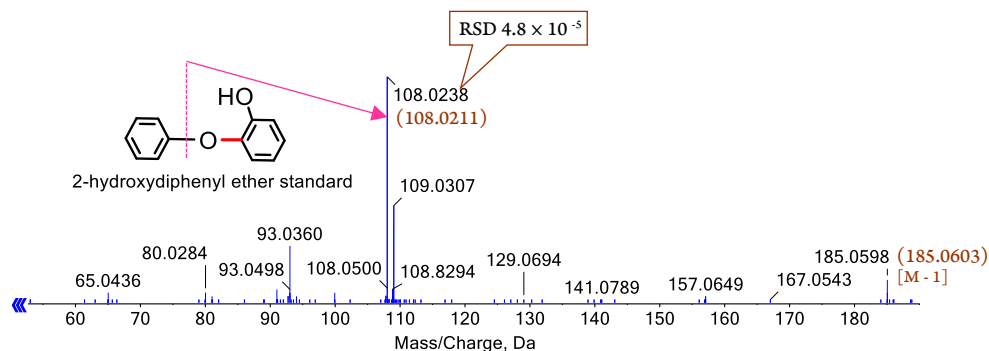

**Fig. S1.5** The molecular ion peak and MS/MS spectra of standard 2-hydroxydiphenyl ether (**1e**,  $C_{12}H_{10}O_2$ , CAS 2417-10-9, M.W. 186.0681).

The bracketed value is the calculated  $m/z$  value. RSD = experimental  $m/z$  value  $\div$  calculated  $m/z$  value.

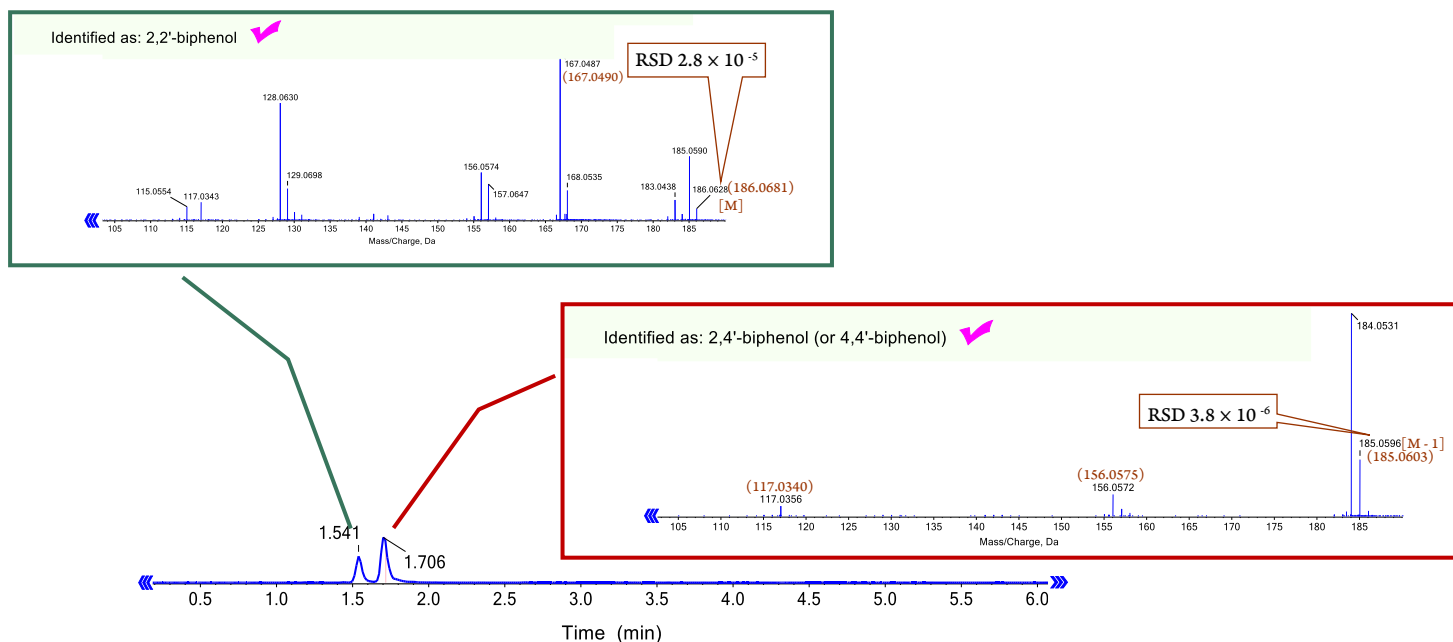

**Fig. S1.6** The main UHPLC-ESI-Q-TOF-MS results of dimerization products of DPPH<sup>•</sup>-treated phenol (1) in methanol and product identifications.

The chromatographic peaks were extracted using formula  $[C_{12}H_{10}O_2 - H]$ . The bracketed value is the calculated  $m/z$  value.  $RSD = \text{experimental } m/z \text{ value} \div \text{calculated } m/z \text{ value}$ . The product peak was identified through comparison of the molecular ion peak and MS/MS data with the standards.

The 1.541 min peak was fully identified as 2,2'-biphenol (1a). The identification was based on the evidence that, (1) molecular ion peak showed very low RSD value ( $10^{-5}$ ) comparison with the calculated M.W.; (2) The MS spectra profile of product was similar to that of standard 2,2'-biphenol; (3) the characteristic fragment  $m/z$  167, a result of adjacent site elimination effect (i.e.,  $-H_2O$ ). [3]

The 1.706 min peak was identified as 2,4'-biphenol 1b (or 4,4'-biphenol 1c). The identification was based on two characteristic fragments  $m/z$  117 and 156. Although 1b and 1c were not strictly recognized, however, it cannot hinder the discussion regarding the C-C bonding domination rule and meta-excluded rule in the main text.

The exclusion of two ethers (4-hydroxyldiphenyl ether 1d and 2-hydroxyldiphenyl ether 1e) was based on  $m/z$  108, the characteristic fragment and basic peak, which was elucidated in Fig. S1.4-S1.5.

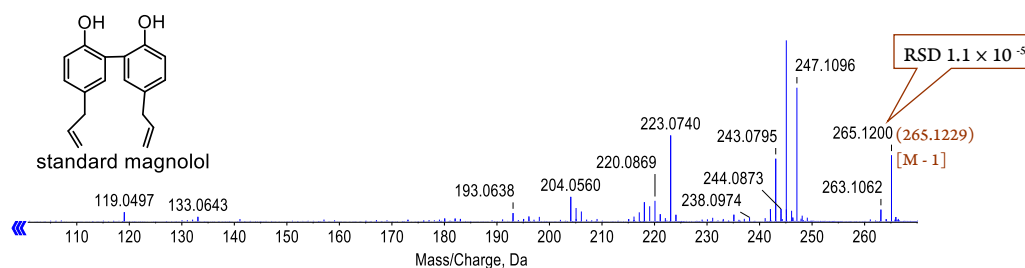

**Fig. S2.1** The molecular ion peak and MS/MS spectra of standard magnolol (**2a**,  $C_{18}H_{18}O_2$ , CAS number: 528-43-8, M.W. 266.1307). The bracketed value is the calculated  $m/z$  value. RSD = experimental  $m/z$  value  $\div$  calculated  $m/z$  value.

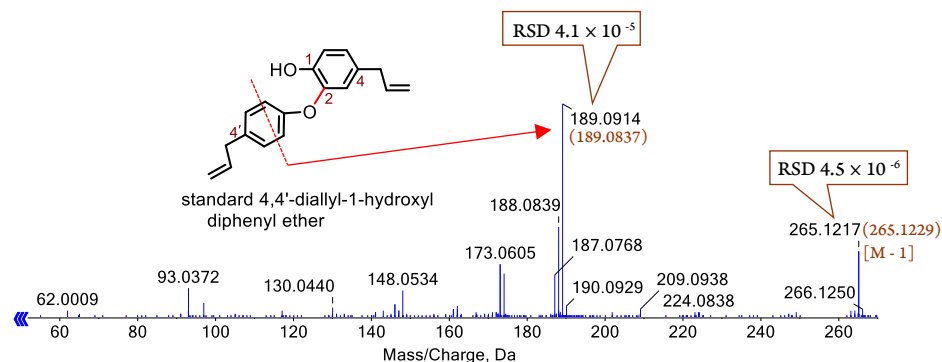

**Fig. S2.2** The molecular ion peak and MS/MS spectra of standard 4,4'-diallyl-1-hydroxydiphenyl ether (**2b**,  $C_{18}H_{18}O_2$ , newly synthesized, M.W. 266.1307). The bracketed value is the calculated  $m/z$  value. RSD = experimental  $m/z$  value  $\div$  calculated  $m/z$  value.

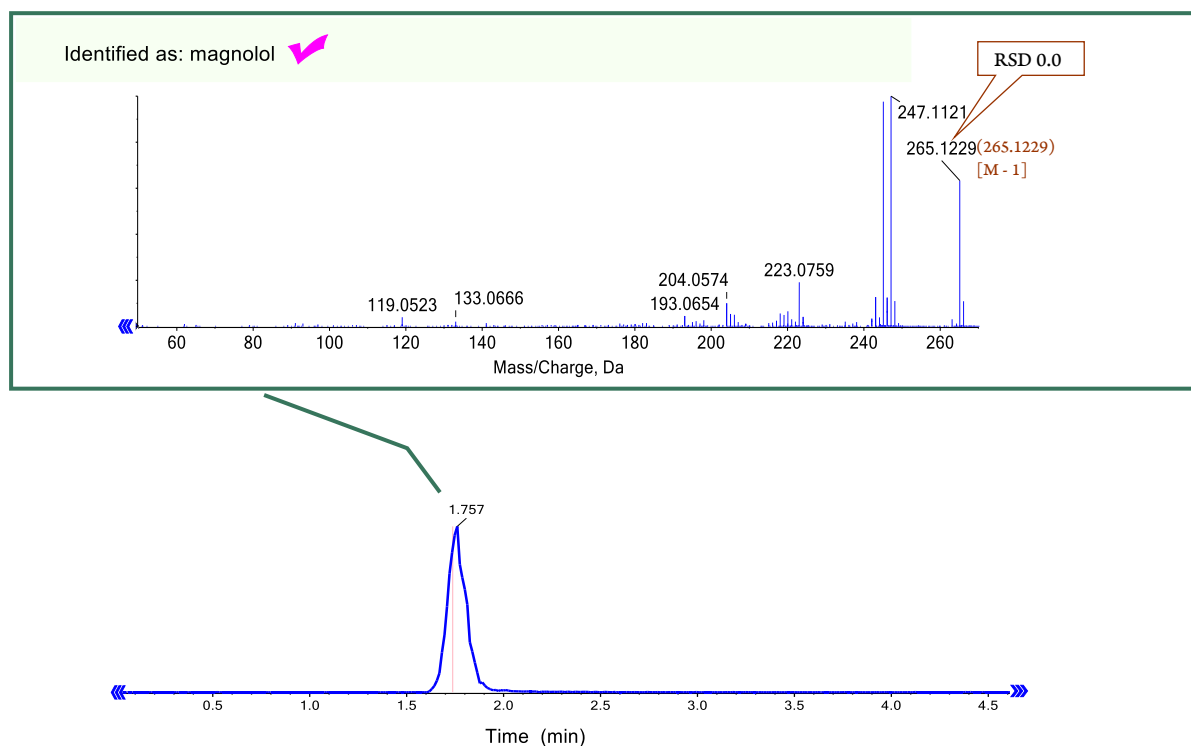

**Fig. S2.3** The main UHPLC-ESI-Q-TOF-MS results of dimerization products of DPPH $^{\cdot}$ -treated 4-allylphenol (**2**) in methanol and product identifications. The chromatographic peaks were extracted using formula  $[C_{18}H_{18}O_2 - H]$ . The bracketed value is the calculated  $m/z$  value. RSD = experimental  $m/z$  value  $\div$  calculated  $m/z$  value.

The product peak was identified through comparison of the molecular ion peak and MS/MS data with the standards. The 1.757 min peak was thus identified as magnolol (**2a**); and 4,4'-diallyl-1-hydroxydiphenyl ether (**2b**) was excluded for the absence of characteristic fragment  $m/z$  189 in the product MS/MS spectra.

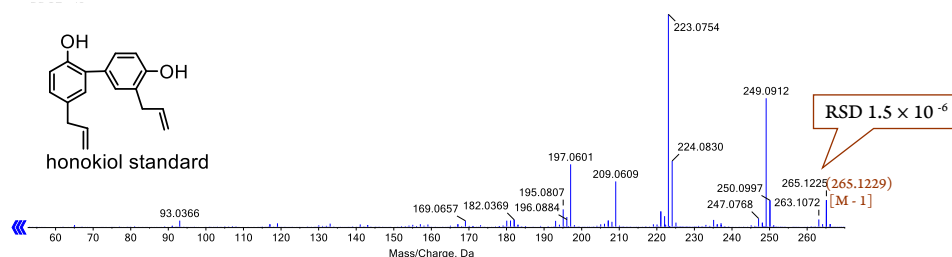

**Fig. S3.1** The molecular ion peak and MS/MS spectra of standard honokiol (**3a**,  $C_{18}H_{18}O_2$ , CAS number: 35354-74-6, M.W. 266.1307). The bracketed value is the calculated  $m/z$  value.  $RSD = \text{experimental } m/z \text{ value} \div \text{calculated } m/z \text{ value}$ .

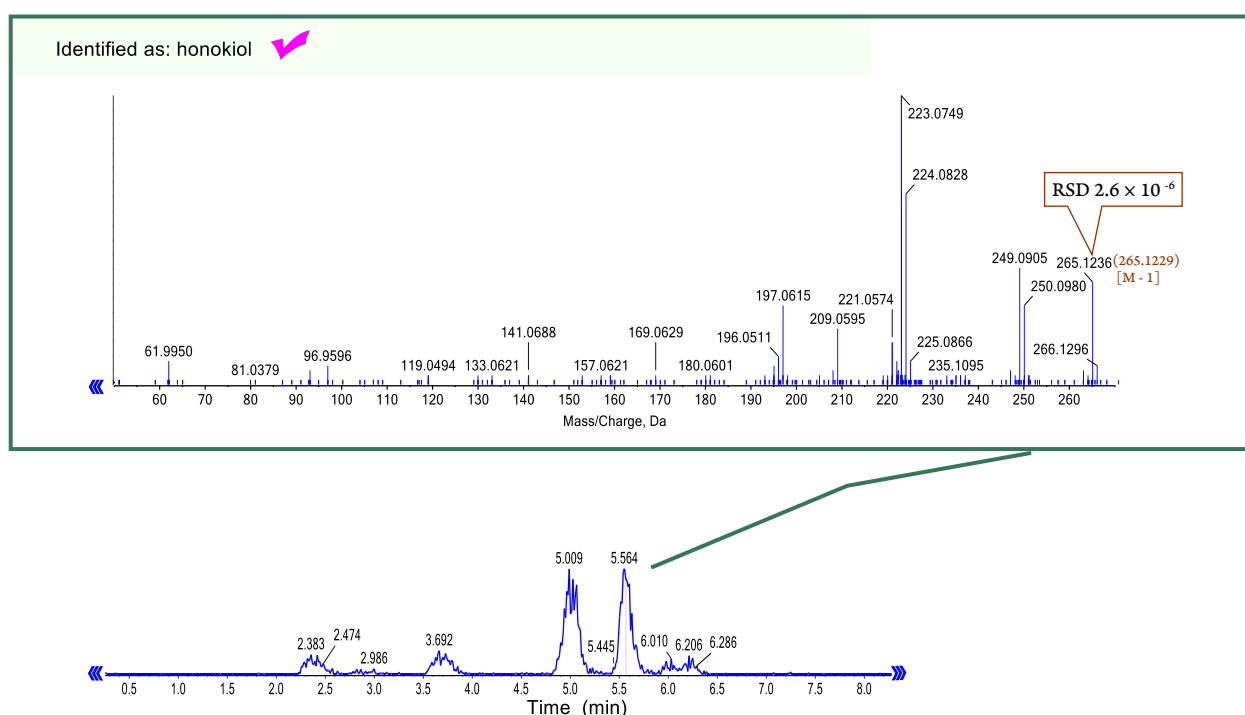

**Fig. S3.2** The main UHPLC-ESI-Q-TOF-MS results of products of DPPH $^{\cdot-}$ -treated 4-allylphenol (**2**) plus 2-allylphenol (**3**) in methanol and product identification.

The chromatographic peaks were extracted using formula  $[C_{18}H_{18}O_2 - H]$ . The bracketed value is the calculated  $m/z$  value.  $RSD = \text{experimental } m/z \text{ value} \div \text{calculated } m/z \text{ value}$ . The product peak was identified through comparison of the molecular ion peak and MS/MS data with the standards. The 5.564 min peak was thus identified as honokiol (**3a**).

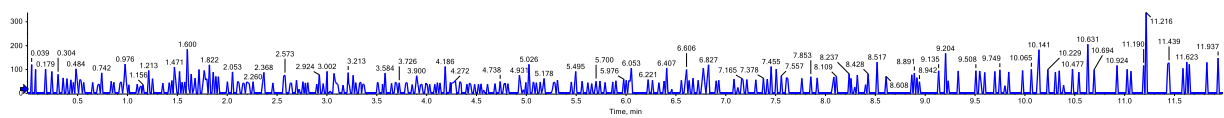

**Fig. S4.1** The chromatographic peaks of dimerization products of DPPH<sup>•</sup>-treated syringic acid (**4**) in methanol. (The peaks extracted using formula  $[C_{18}H_{18}O_{10} - H]$ )

There was no dimeric product.



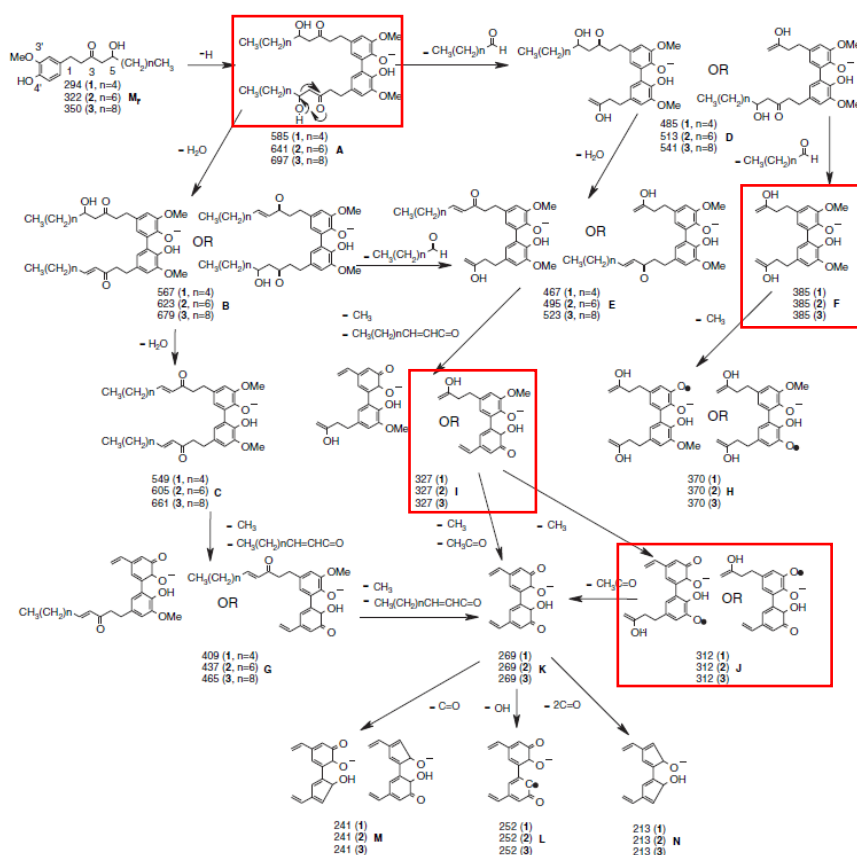

**Fig. S5.1** The screenshot of documented data and elucidation of [6]-gingerol 6,6'-dimer (5a) and [10]-gingerol 6,6'-dimer (6a) [4].

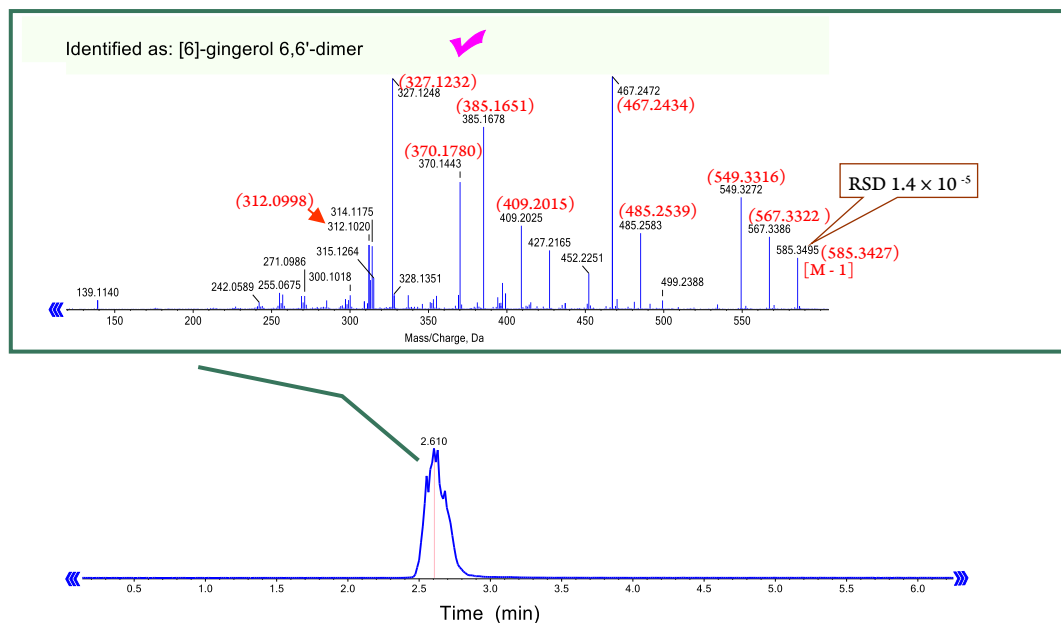

**Fig. S5.2** The main UHPLC-ESI-Q-TOF-MS results of dimerization products of DPPH<sup>•</sup>-treated [6]-gingerol (5) in methanol and [6]-gingerol 6,6'-dimer (5a) identification.

The chromatographic peaks were extracted using formula  $[C_{34}H_{50}O_8 - H]$ . The bracketed value in red is the calculated  $m/z$  value.  $RSD = \text{experimental } m/z \text{ value} \div \text{calculated } m/z \text{ value}$ . The product peak was identified through comparison of the documented molecular ion peak and MS/MS data [4]. The 2.610 min peak was thus identified as [6]-gingerol 6,6'-dimer (5a).

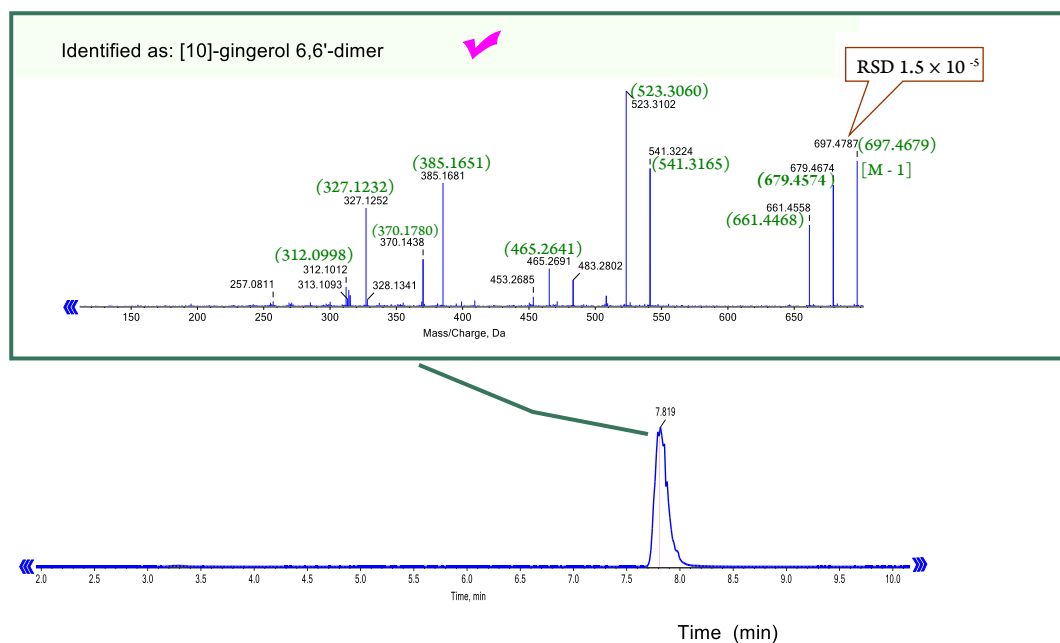

**Fig. S6.1** The main UHPLC–ESI–Q–TOF–MS results of dimerization products of DPPH<sup>•</sup>-treated [10]-gingerol (**6**) in methanol and product identification.

The chromatographic peaks were extracted using formula  $[C_{42}H_{66}O_8 - H]$ . The bracketed value in green is the calculated  $m/z$  value.  $RSD = \text{experimental } m/z \text{ value} \div \text{calculated } m/z \text{ value}$ . The product peak was identified through comparison of the documented molecular ion peak and MS/MS data (green in Fig. S5.1) [4]. The 7.819 min peak was thus identified as [10]-gingerol 6,6' dimer (**6a**).

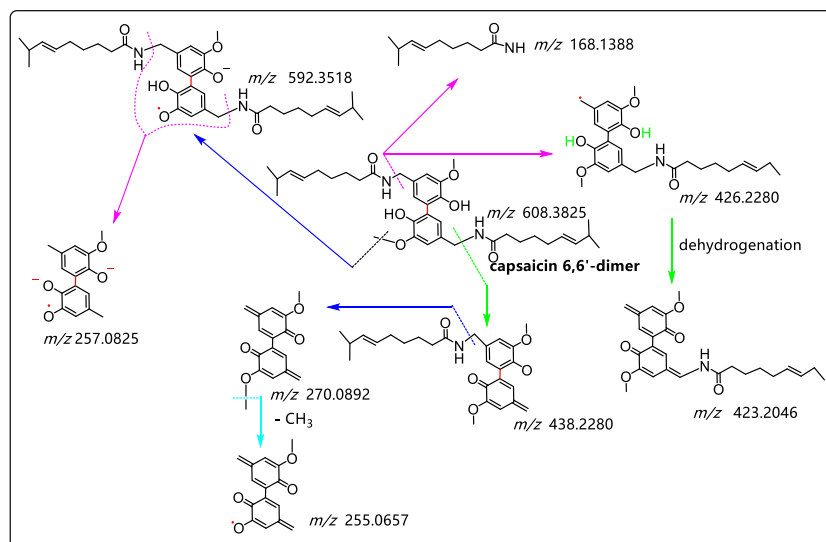

**Fig. S7.1** The MS elucidation of capsaicin 6,6'-dimer (7a).

The structure, molecular ion peak, and some fragmenting pathways of capsaicin 6,6'-dimer (7a) were proposed by the previous study [5].

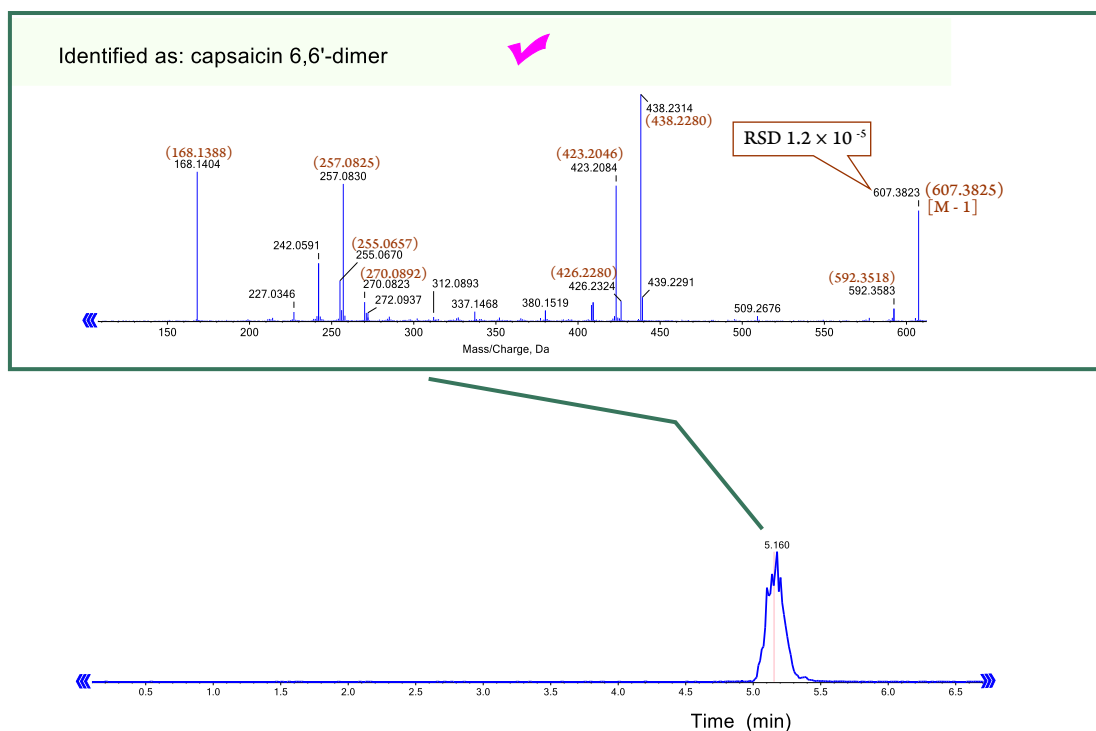

**Fig. S7.2** The main UHPLC-ESI-Q-TOF-MS results of dimerization products of DPPH•-treated capsaicin (7) in methanol and product identification.

The chromatographic peaks were extracted using formula  $[C_{36}H_{52}N_2O_6 - H]$ . The bracketed value is the calculated  $m/z$  value, which was cited from Fig. S7.1.  $RSD = \text{experimental } m/z \text{ value} \div \text{calculated } m/z \text{ value}$ . The product peak was identified through comparison of the documented molecular ion peak and MS/MS data (Fig. S7.1) [5]. The 5.160 min peak was thus identified as capsaicin 6,6'-dimer (7a).

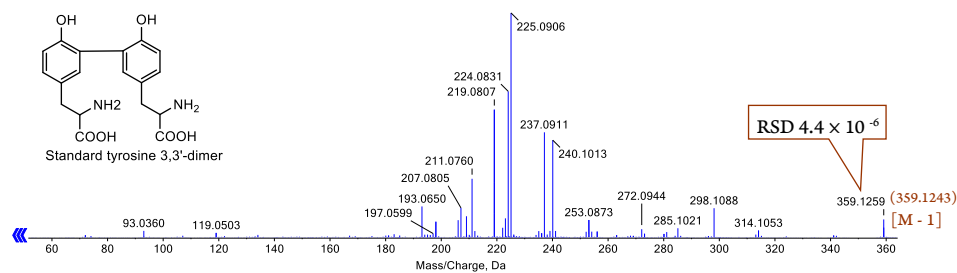

**Fig. S8.1** The molecular ion peak and MS/MS spectra of standard tyrosine 3,3'-dimer (**8a**,  $C_{18}H_{20}N_2O_6$ , newly synthesized, M.W. 360.1321).

The bracketed value is the calculated  $m/z$  value.  $RSD = \text{experimental } m/z \text{ value} \div \text{calculated } m/z \text{ value}$ .

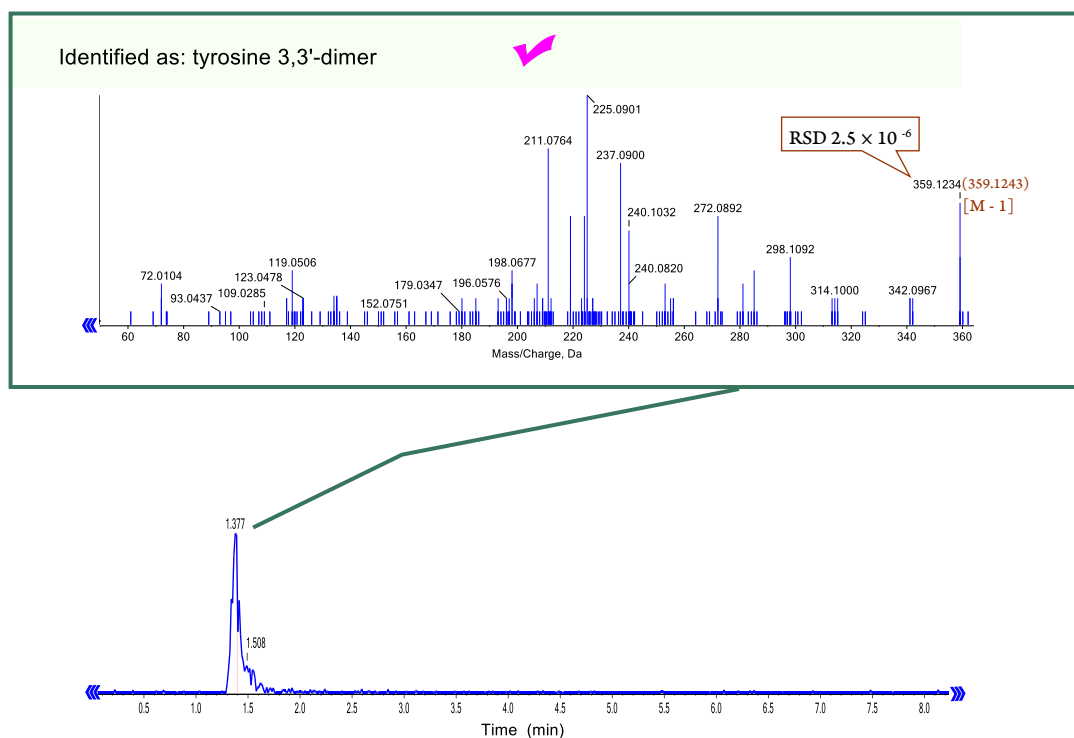

**Fig. S8.2** The main UHPLC-ESI-Q-TOF-MS results of dimerization products of DPPH<sup>+</sup>-treated tyrosine (**8**) in methanol and product identification.

The chromatographic peaks were extracted using formula  $[C_{18}H_{20}N_2O_6 - H]$ . The bracketed value is the calculated  $m/z$  value.  $RSD = \text{experimental } m/z \text{ value} \div \text{calculated } m/z \text{ value}$ . The product peak was identified through comparison of the molecular ion peak and MS/MS data of standard tyrosine 3,3'-dimer (**8a**). The 1.377 min peak was thus identified as tyrosine 3,3'-dimer (**8a**).

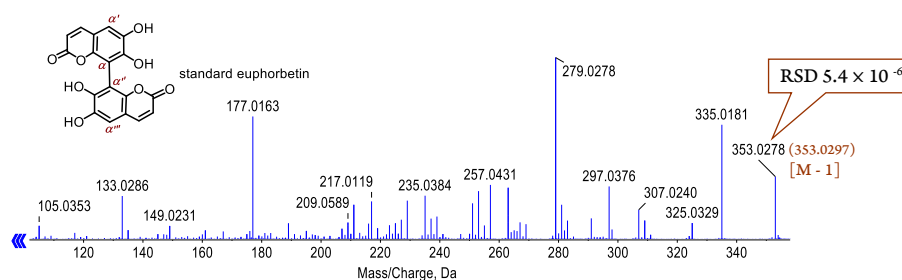

**Fig. S9.1** The molecular ion peak and MS/MS spectra of standard euphorbetin (**9a**,  $C_{18}H_{10}O_8$ , CAS 35897-99-5, M.W. 354.0376). The bracketed value is the calculated  $m/z$  value. RSD = experimental  $m/z$  value  $\div$  calculated  $m/z$  value.

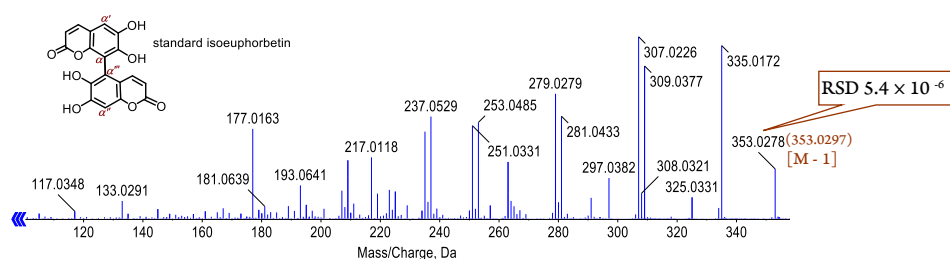

**Fig. S9.2** The molecular ion peak and MS/MS spectra of standard isoeuphorbetin (**9b**,  $C_{18}H_{10}O_8$ , CAS 50677-55-9, M.W. 354.0376). The bracketed value is the calculated  $m/z$  value. RSD = experimental  $m/z$  value  $\div$  calculated  $m/z$  value.

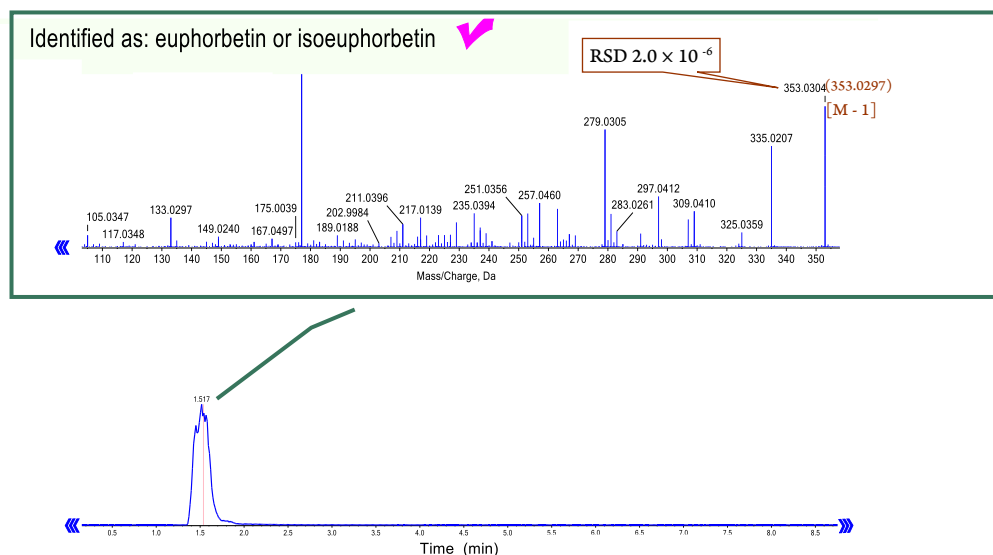

**Fig. S9.3** The main UHPLC-ESI-Q-TOF-MS results of dimerization products of DPPH $\cdot$ -treated esculetin (**9**) in methanol and product identification.

The chromatographic peaks were extracted using formula  $[C_{18}H_{10}O_8 - H]$ . The bracketed value is the calculated  $m/z$  value. RSD = experimental  $m/z$  value  $\div$  calculated  $m/z$  value. The product peak was identified through comparison of the molecular ion peak and MS/MS data of standard euphorbetin (**9a**) and isoeuphorbetin (**9b**).

The 1.517 min peak was thus identified as **9a** or **9b**. Although the two isomers were not strictly distinguished, however, it cannot hinder the discussion regarding the basic rules in the main text.

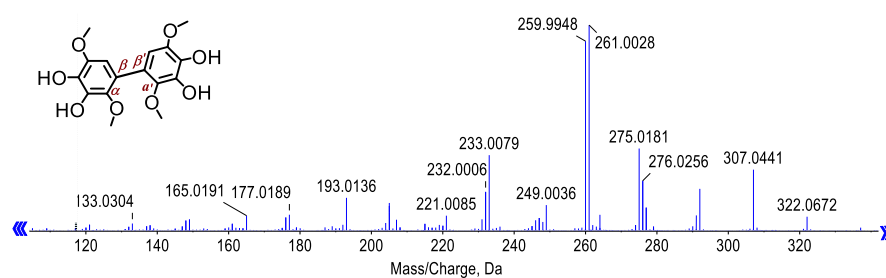

**Fig. S10.1** The molecular ion peak and MS/MS spectra of standard 3,6-dimethoxycatechol β,β'-dimer (10, newly synthesized, C<sub>16</sub>H<sub>18</sub>O<sub>8</sub>, M.W. 338.1002).

The bracketed value is the calculated  $m/z$  value. RSD = experimental  $m/z$  value ÷ calculated  $m/z$  value.

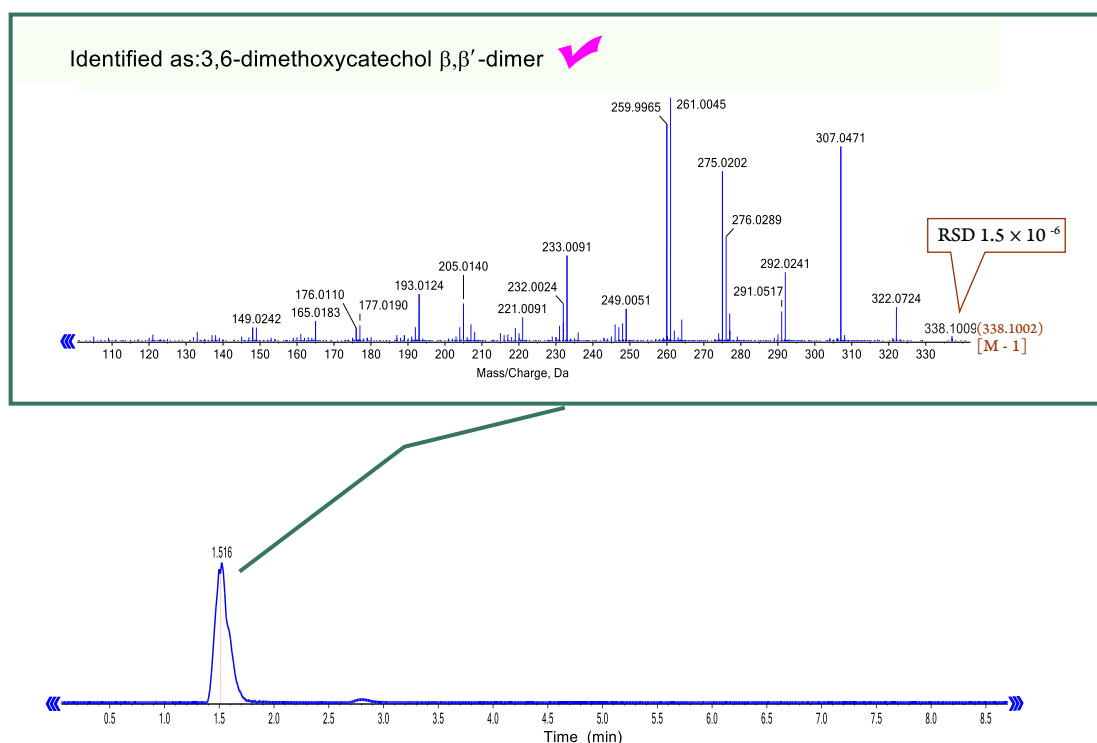

**Fig. S10.2** The main UHPLC-ESI-Q-TOF-MS results of dimerization products of DPPH<sup>•</sup>-treated 3,6-dimethoxycatechol (10, newly synthesized) in methanol and product identification.

The chromatographic peaks were extracted using formula [C<sub>16</sub>H<sub>18</sub>O<sub>8</sub> - H]. The bracketed value is the calculated  $m/z$  value. RSD = experimental  $m/z$  value ÷ calculated  $m/z$  value. The product peak was identified through comparison of the molecular ion peak and MS/MS data of standard 3,6-dimethoxycatechol β,β'-dimer (10a). The 1.516 min peak was thus identified as 3,6-dimethoxycatechol β,β'-dimer (10a).

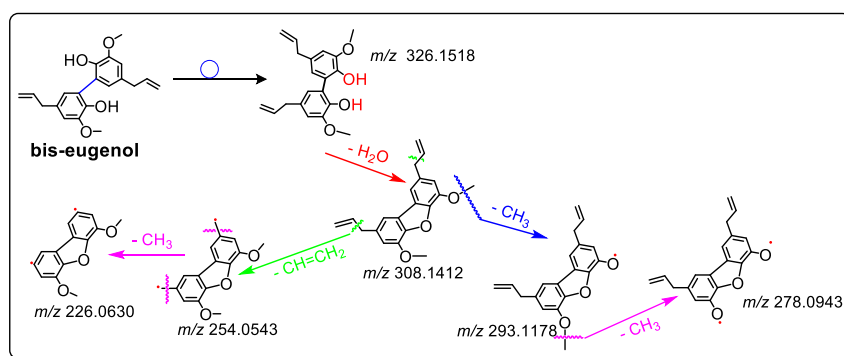

**Fig. S11.1** The MS elucidation of bis-eugenol (11a, i.e., dehydrodieugenol, eugenol 6,6'-dimer, M.W. 326.1518).

The structure, molecular ion peak, and some fragmenting pathways of bis-eugenol (11a) were proposed by the previous study<sup>[6]</sup>. The circle "O" indicates the rotation of  $\sigma$ -bond. The dehydration ( $-H_2O$ ) in red is a consequence of adjacent elimination effect.<sup>[3]</sup>

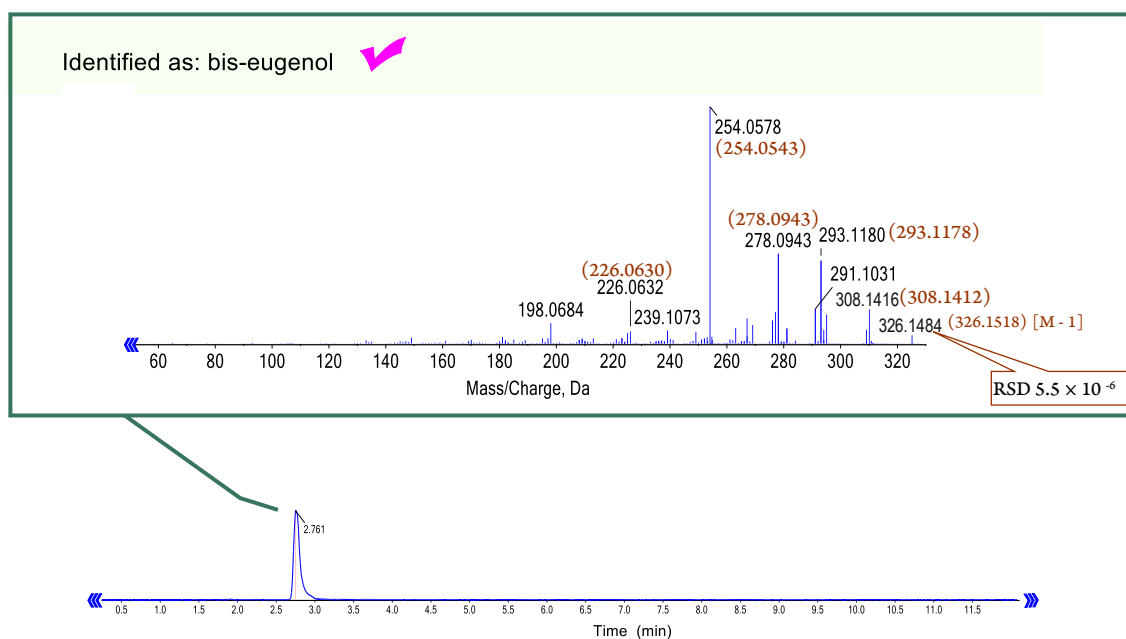

**Fig. S11.2** The main UHPLC-ESI-Q-TOF-MS results of dimerization products of DPPH<sup>•</sup>-treated eugenol (11) in methanol and product identification.

The chromatographic peaks were extracted using formula  $[C_{20}H_{22}O_4 - H]$ . The bracketed value is the calculated  $m/z$  value, which was cited from Fig. S11.1. RSD = experimental  $m/z$  value  $\div$  calculated  $m/z$  value. The product peak was identified through comparison of the documented molecular ion peak and MS/MS data (Fig. S11.1)<sup>[6]</sup>. The 2.761 min peak was thus identified as bis-eugenol (11a). The characteristic and basic peak ( $m/z$  254.0578) can be used to distinguish from dehydrodiisoeugenol (12a).

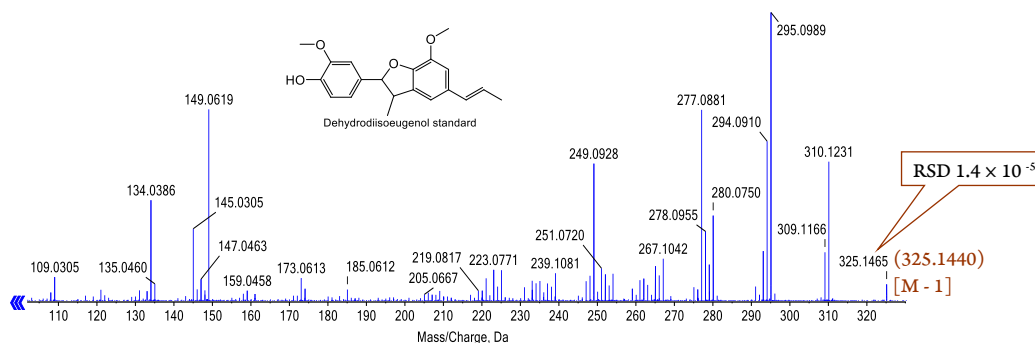

**Fig. S12.1** The molecular ion peak and MS/MS spectra of standard dehydrodiisoeugenol (**12a**, CAS 2680-81-1,  $C_{20}H_{22}O_4$ , M.W. 326.1518).

The bracketed value is the calculated  $m/z$  value.  $RSD = \text{experimental } m/z \text{ value} \div \text{calculated } m/z \text{ value}$ .

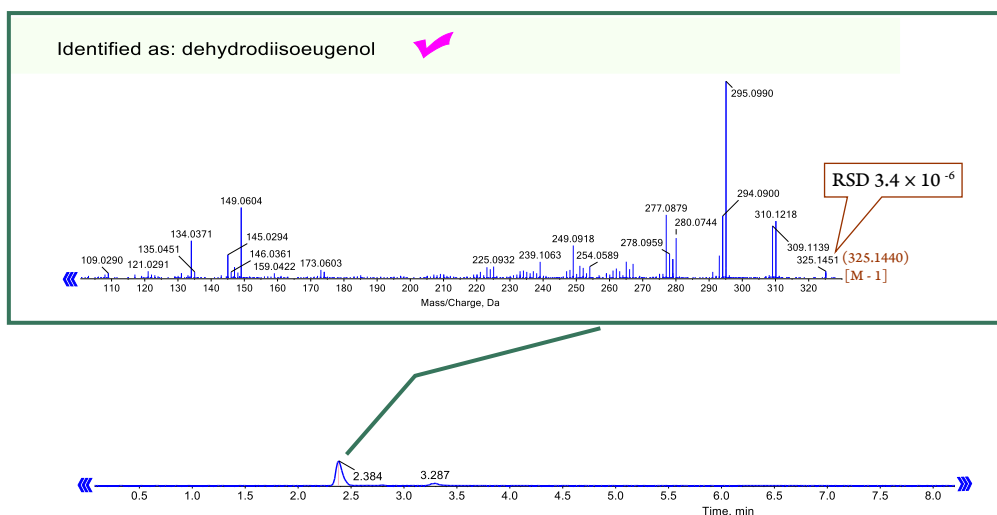

**Fig. S12.2** The main UHPLC-ESI-Q-TOF-MS results of dimerization products of DPPH $\cdot$ -treated isoeugenol (**12**) in methanol and product identification.

The chromatographic peaks were extracted using formula  $[C_{20}H_{22}O_4 - H]$ . The bracketed value is the calculated  $m/z$  value.  $RSD = \text{experimental } m/z \text{ value} \div \text{calculated } m/z \text{ value}$ . The product peak was identified through comparison of the molecular ion peak and MS/MS data of standard dehydrodiisoeugenol (**12a**). The 2.384 min peak was thus identified as dehydrodiisoeugenol (**12a**).



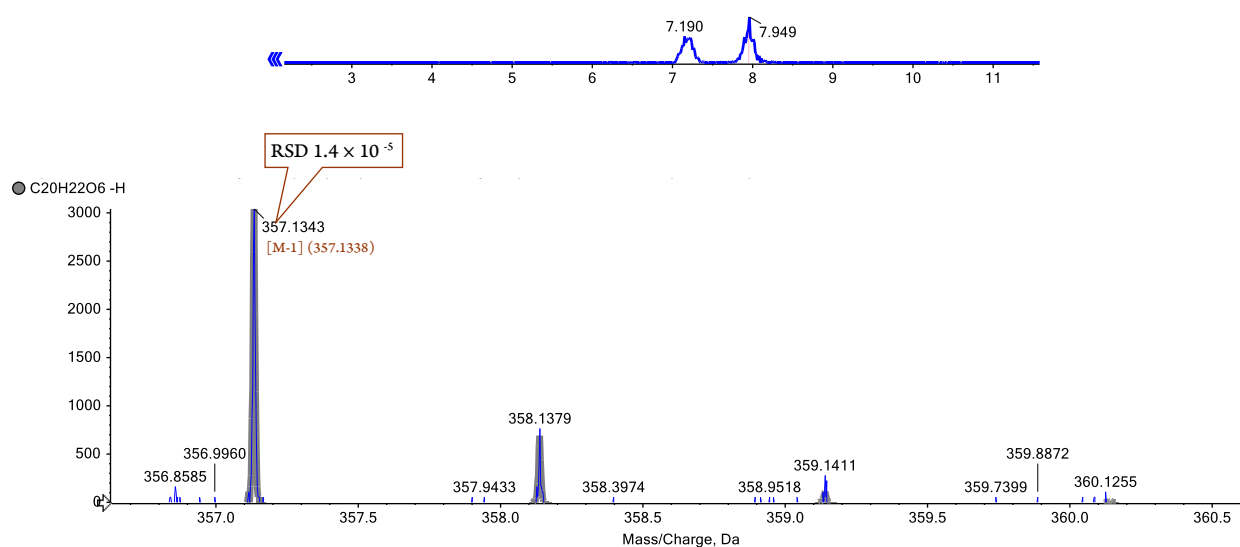

**Fig. S13.1** The typical UHPLC–ESI–Q–TOF–MS results of dimerization products of DPPH<sup>+</sup>-treated coniferyl alcohol (13) in methanol. The chromatographic peaks were extracted using formula  $[C_{20}H_{22}O_6 - H]$ . The bracketed value is the calculated  $m/z$  value. RSD = experimental  $m/z$  value  $\div$  calculated  $m/z$  value.

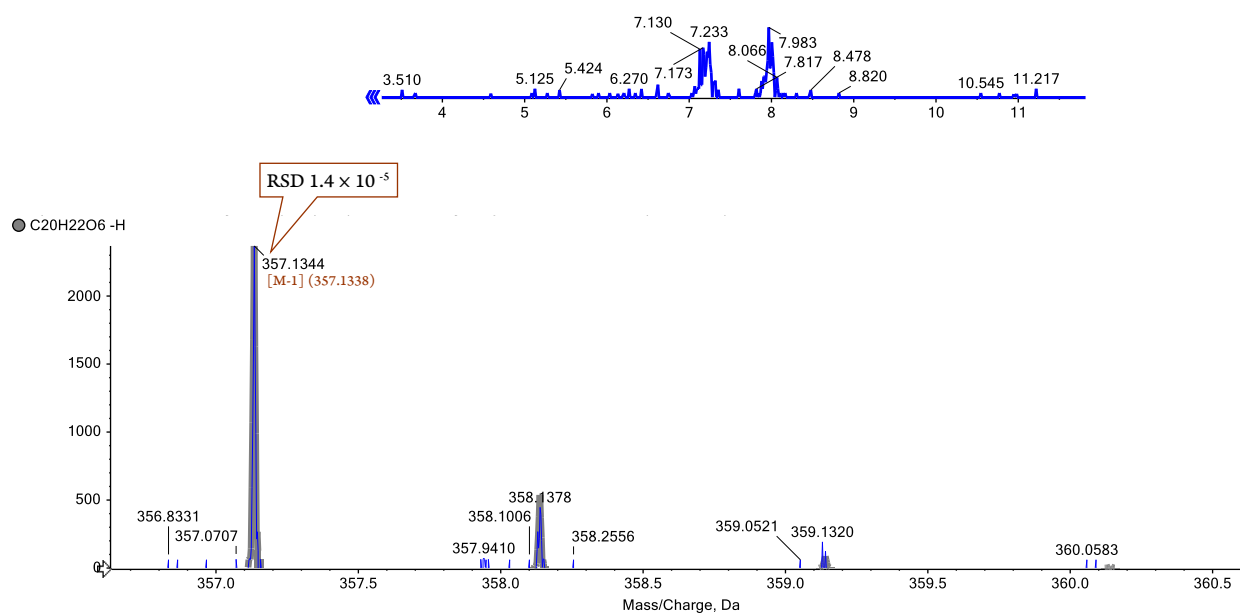

**Fig. S13.2** The typical UHPLC–ESI–Q–TOF–MS results of dimerization products of HRP-catalyzed coniferyl alcohol (13). The chromatographic peaks were extracted using formula  $[C_{20}H_{22}O_6 - H]$ . The bracketed value is the calculated  $m/z$  value. RSD = experimental  $m/z$  value  $\div$  calculated  $m/z$  value.

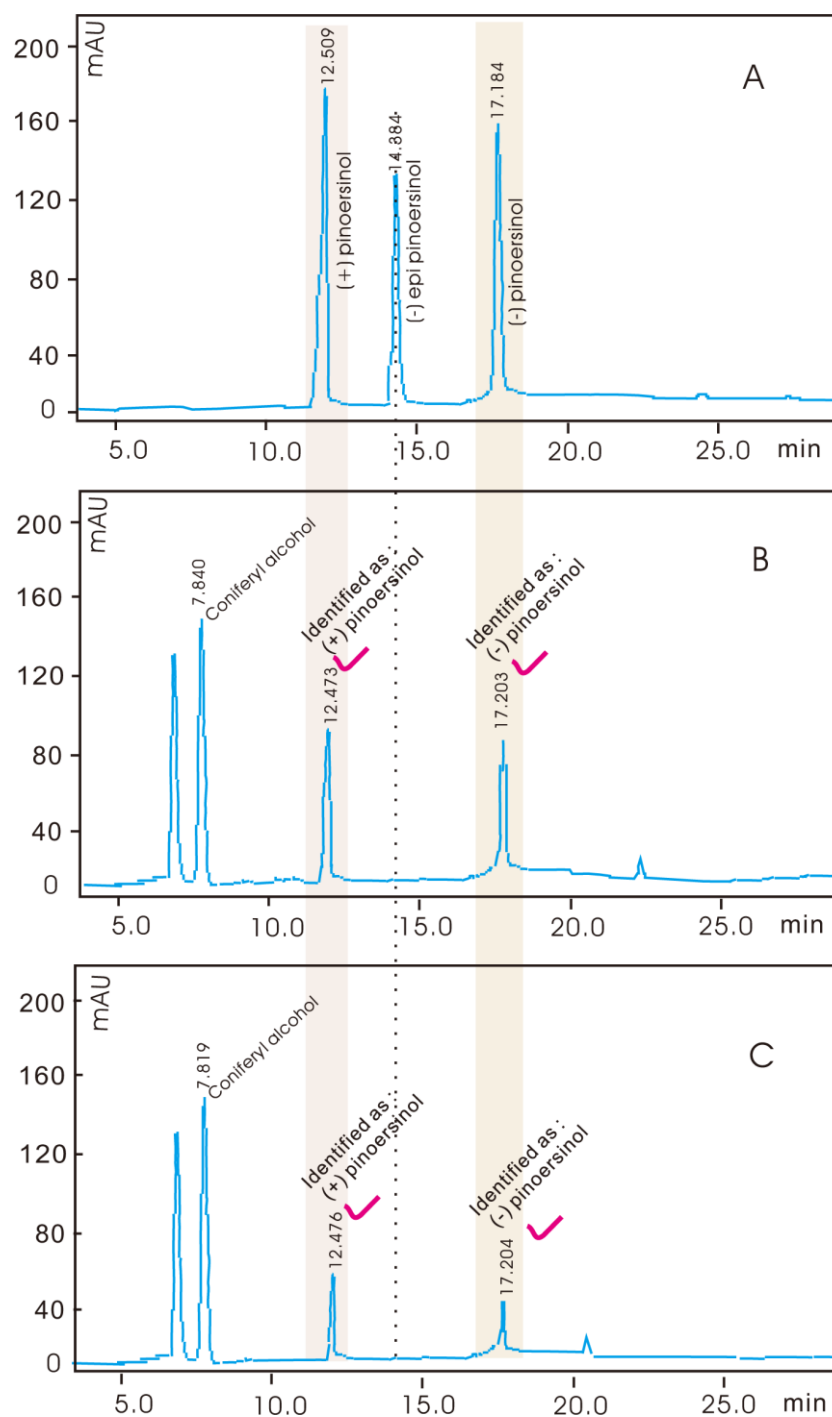

**Fig. S13.3** The main results of HPLC-UV analyses for product identification of coniferyl alcohol (13) dimerization: A, spectra of standard (+) pinosresinol [(+) (13a)], (-) pinosresinol [(-) (13a)], and (-) epi pinosresinol [(-) (13b)]; B, dimerization products of DPPH•-treated coniferyl alcohol (13) in methanol; C, dimerization products of HRP-catalyzed coniferyl alcohol (13).

Agilent 1260 (Agilent Technologies Inc., Palo Alto, CA, USA) equipped with Chiral-MD(2)-RH Phenomenex (250 mm × 4.6 mm, 5 μm) (Torrance, CA, USA). The mobile phase: 0.1% H<sub>3</sub>PO<sub>4</sub> : ACN (50:50); Injection volume: 5 μL; flow rate: 0.5 mL/min; Determination absorbance wavelength 280 nm.

**Product identification and exclusion:** To preliminarily identify the dimeric products, the products were determined using in UHPLC-ESI-Q-TOF-MS analysis *in situ*. As seen in Fig. S13.1 and Fig. S13.2, DPPH•-treated and HRP-catalyzed coniferyl alcohol (13) respectively

produced two chromatographic peaks with  $[C_{20}H_{22}O_6 - H]$  formula and the M.W.  $C_{20}H_{22}O_6$ . The documents suggested these peaks as pinoresinols [7]. Consulting with the method [7], these peaks were further distinguished using chiral column-based HPLC-UV analysis. As seen in Fig. S13.3, the dimeric products of coniferyl alcohol (13) were proven to be (+) pinoresinol [(+) (13a)] and (-) pinoresinol [(-) (13a)]. However, there was no (-) epipinoresinol [(-) (13b)].

## References

- [1] Tahiliani, M.; Koh, K.P.; Shen, Y.; Pastor, W.A.; Bandukwala, H.; Brudno, Y.; Agarwal, S.; Iyer, L.M.; Liu, D.R.; Aravind, L.; Rao, A. Conversion of 5-methylcytosine to 5-hydroxymethylcytosine in mammalian DNA by MLL partner TET1. *Science*. **2009**, 324, 930-935.
- [2] He, Y.F.; Li, B.Z.; Li, Z.; Liu, P.; Wang, Y.; Tang, Q.; Ding, J.; Jia, Y.; Chen, Z.; Li, L.; Sun, Y.; Li, X.; Dai, Q.; Song, C.X.; Zhang, K.; He, C.; Xu, G.L. Tet-mediated formation of 5-carboxylcytosine and its excision by TDG in mammalian DNA. *Science*. **2011**, 333, 1303-1307.
- [3] J.H., G., *Mass spectrometry*. 2013, Beijing: Science press.
- [4] Jiang, H.; Somogyi, A.; Timmermann, B.N.; Gang, D.R. Instrument dependence of electrospray ionization and tandem mass spectrometric fragmentation of the gingerols. *Rapid Commun Mass Spectrom*. **2006**, 20, 3089-3100.
- [5] Tian, K.; Zhu, J.; Li, M.; Qiu, X. Capsaicin is efficiently transformed by multiple cytochrome P450s from Capsicum fruit-feeding Helicoverpa armigera. *Pestic Biochem Physiol*. **2019**, 156, 145-151.
- [6] Dos Santos Grecco, S.; Letsyo, E.; Tempone, A.G.; Ghilardi Lago, J.H.; Jerz, G. Electrospray mass-spectrometry guided target isolation of neolignans from Nectandra leucantha (Lauraceae) by high performance- and spiral-coil countercurrent chromatography. *J Chromatogr A*. **2019**, 1608, 460422.
- [7] Davin, L.B.; Wang, H.B.; Crowell, A.L.; Bedgar, D.L.; Martin, D.M.; Sarkanen, S.; Lewis, N.G. Stereoselective bimolecular phenoxy radical coupling by an auxiliary (dirigent) protein without an active center. *Science*. **1997**, 275, 362-366.
