# Supplementary material for: Phytophenol Dimerization Reaction: From Basic Rules to Diastereoselectivity and Beyond
Source: Molecules. 2022 Jul 28;27(15):4842. doi: 10.3390/molecules27154842 (PMC9369853; doi:10.3390/molecules27154842)
Supplement: Supplementary file 1 [file molecules-27-04842-s001.zip]

Archive with 4 entries (4 files):
- Supplementary File S1 Product identification in situ.pdf
- Supplementary File S2 Experimental & Computational Details.pdf
- Supplementary File S3 45 instances of 3,7-dioxabicyclo[3.3.pdf
- Supplementary File S4 Explanation or prediction in other fields.pdf
